# Supplementary material
Source: publisher figshare collection journal article supplement (https://diabetesjournals.figshare.com/ndownloader/files/26619968)
Supplement: Supplementary file 1 [file 26619968]

## Online Appendix, Supplementary Material

### Neuroimaging post-processing and software

#### *FDG-PET*

The cardiac PET scan was reconstructed into 26 frames of increasing durations (1x10, 8x5, 4x10, 2x15, 3x20, 4x30, 6x60 s). The brain PET scan was reconstructed into frames of 5 min duration each. All images were reconstructed using time-of-flight ordered subsets expectation maximization using 2 iterations and 28 subsets, including resolution recovery, and a 5 mm gaussian post-filter. A 1 cm diameter volume of interest was placed over 10 slices in the ascending aorta in the frame where it was best visible and transferred to all image frames to obtain the first 10 min of the blood time-activity curve. Forward cardiac output was calculated as the ratio between the injected amount of radioactivity and the area under the curve of the first pass peak in the ascending aorta (1; 2).

PET images were corrected for inter-frame motion and whole-brain grey matter time-activity curves were extracted based on gray matter segmentation using SPM12 (Wellcome Trust Centre for Neuroimaging, London, UK). Net uptake rate of  $^{18}\text{F}$ -FDG ( $K_i$ ) and metabolic rate of glucose ( $\text{MR}_{\text{glu}}$ ) during euglycemia and hypoglycemia were calculated using a dual-phase basis function implementation of an irreversible two-tissue compartment model allowing for a change in rate constants during the glucose reduction phase, both for whole brain grey matter and at the voxel level (3). Metabolic rate of glucose ( $\text{MR}_{\text{glu}}$ ) was calculated by multiplication of  $K_i$  with the plasma glucose concentration and division by 0.65, the lumped constant accounting for differences between FDG and glucose uptake in the brain. Voxel-wise differences between  $K_i$  during euglycemia and hypoglycemia and between baseline and post-RYGB were assessed using SPM12.

### *Arterial spin labeling (ASL)*

T2-weighted Fluid attenuated inversion recovery (T2w-FLAIR) and cerebral blood flow ASL ( $\text{CBF}_{\text{ASL}}$ ) images were co-registered to each subject's corresponding T1-weighted image (T1w). The following grey matter (GM) regions were included in the analysis: total GM, cerebral cortical- (frontal, parietal, occipital and temporal lobe), basal ganglia- (caudate, putamen, pallidum), limbic- (amygdala and hippocampus), other subcortical regions (thalamus and hypothalamus) and cerebellar cortical regions. Grey matter (GM) tissue probability maps were segmented based on T1w images and co-registered T2w-FLAIR images. GM and white matter (WM) maps were defined with a tissue probability fraction above 75%. Cerebellum, cortical, limbic and other subcortical regions (not including hypothalamus) were segmented on 3D-T1w and co-registered T2-FLAIR images using the Freesurfer processing pipeline (version 6.0, <http://surfer.nmr.mgh.harvard.edu>)(4).

Hypothalamus has previously been defined in Montreal Neurological Institute (MNI)-space by Ilinsky et al (5) (data is freely available at [www.humanmotorthalamus.com](http://www.humanmotorthalamus.com)). The deformation field defining the transformation from subject-specific space to MNI-space was derived based on the individual T1w image and applied to all  $\text{CBF}_{\text{ASL}}$  images. Thus, hypothalamus-specific CBF values were extracted. All processing steps as described above were performed using the SPM12 toolbox (Wellcome Trust Centre for Neuroimaging, London, UK) if not stated otherwise.

### *fMRI: TICA analysis of functional connectivity*

The following data pre-processing was applied: masking of non-brain voxels; voxel-wise de-meaning of the data; normalization of the voxel-wise variance. Pre-processed data were whitened and projected into a 20-dimensional subspace using Principal Component Analysis. The whitened observations were decomposed into sets of vectors, which describe signal

variation across the temporal domain (time-courses), the session/participant domain and across the spatial domain (maps) by optimising for non-Gaussian spatial source distributions using a fixed-point iteration technique (6). Estimated Component maps were divided by the standard deviation of the residual noise and thresholded by fitting a mixture model to the histogram of intensity values (7).

#### *fMRI: ROI to ROI analysis*

The only extension with respect to standard processing procedure was the creation of new ROIs for medial and lateral hypothalamus (MH and RH) according to Li et al (8) and the hypothalamic MRI atlas by Baroncini (8; 9): the bilateral LH ( $x \pm 6$ ,  $y - 9$ ,  $z - 10$  plus 2 mm sphere) and MH ( $x \pm 4$ ,  $y - 2$ ,  $z - 12$  plus 2 mm sphere).

**Table 1: Acquisition parameters of MRI scans**

| Name            | Sequence type            | Orientation | TR/TE/TI/FA        | Matrix (mm)     | Slices | Other                                                 |
|-----------------|--------------------------|-------------|--------------------|-----------------|--------|-------------------------------------------------------|
| <b>T1W</b>      | 3D-GRE                   | SAG         | 8.6/3.2/450/12     | 1x0.488x0.488   | 178    | NA                                                    |
| <b>T2-FLAIR</b> | 3D-TSE                   | SAG         | 7500/121/2147/90   | 0.6x0.488x0.488 | 296    | NA                                                    |
| <b>pCASL</b>    | 3D Pseudo-Continuous FSE | TRA         | 4852/10.7/2025/111 | 1.875x1.875x4   | 36     | PLD = 2000<br>LD = 1800<br>No flow crushing gradients |
| <b>ZTE</b>      | RUFIS                    | TRA         | 0.7/0/NA/0.8       | 2.4x2.4x2.4     | 110    | NA                                                    |
| <b>fMRI</b>     | 2D                       | TRA         | 3000/3/NA/90       | 3.4x3.4x3.0     | 45     | NA                                                    |

NA = Not applicable; TR = Repetition Time (ms); TE = Echo Time (ms); TI = Inversion Time (ms); FA = Flip Angle (degrees); TRA = Transversal; SAG = Sagittal; PLD = Post-Label Delay (ms); LD = Label Duration (ms); FSE = Fast Spin Echo; RUFIS = Rotating UltraFast Imaging Sequence

## Statistical software

Excel (Microsoft Corporation, Redmond, WA, USA), GraphPad Prism 8 (GraphPad Software, La Jolla, CA, USA), TIBCO Statistica v 13.5.0.17 (TIBCO Software inc, Palo Alto, CA, USA) and SPSS v 27 (IBM, Armonk, NY, USA) were used for statistical analysis.

## References

1. Sorensen J, Stahle E, Langstrom B, Frostfeldt G, Wikstrom G, Hedenstierna G: Simple and accurate assessment of forward cardiac output by use of 1-(11)C-acetate PET verified in a pig model. *J Nucl Med* 2003;44:1176-1183
2. Knaapen P, Lubberink M, Rijzewijk LJ, van der Meer RW, Unger M, Germans T, Bax JJ, Smit JW, Lamb HJ, van Rossum AC, Diamant M, Visser FC, Lammertsma AA: Stroke volume measurements with first-pass dynamic positron emission tomography: comparison with cardiovascular magnetic resonance. *J Nucl Cardiol* 2008;15:218-224
3. Lubberink M, Kvernby S, Abrahamsson N, Almby K, Fahlstrom M, Gingnell M, Wikström J, Haller S, Sundbom M, Karlsson FA, Eriksson JW: Increased cerebral glucose consumption during hypoglycemia in obese patients measured using dynamic bolus-injection F-18-FDG PET/MR during hyperinsulinemic euglycemic and hypoglycemic clamp. *Eur J Nucl Med Mol Imaging*, 2020, p. S248 [abstract]
4. Fischl B, Salat DH, Busa E, Albert M, Dieterich M, Haselgrove C, van der Kouwe A, Killiany R, Kennedy D, Klaveness S, Montillo A, Makris N, Rosen B, Dale AM: Whole brain segmentation: automated labeling of neuroanatomical structures in the human brain. *Neuron* 2002;33:341-355
5. Ilinsky I, Horn A, Paul-Gilloteaux P, Gressens P, Verney C, Kultas-Ilinsky K: Human Motor Thalamus Reconstructed in 3D from Continuous Sagittal Sections with Identified Subcortical Afferent Territories. *eNeuro* 2018;5
6. Hyvarinen A: Fast and robust fixed-point algorithms for independent component analysis. *IEEE Trans Neural Netw* 1999;10:626-634
7. Beckmann CF, Smith SM: Probabilistic independent component analysis for functional magnetic resonance imaging. *IEEE Trans Med Imaging* 2004;23:137-152
8. Li P, Shan H, Nie B, Liu H, Dong G, Guo Y, Du J, Gao H, Ma L, Li D, Shan B: Sleeve Gastrectomy Rescuing the Altered Functional Connectivity of Lateral but Not Medial Hypothalamus in Subjects with Obesity. *Obes Surg* 2019;29:2191-2199
9. Whitfield-Gabrieli S, Nieto-Castanon A: Conn: a functional connectivity toolbox for correlated and anticorrelated brain networks. *Brain Connect* 2012;2:125-141
